# Supplementary material
Source: PubMed Central journal article supplement (PMC3552925)
Supplement: cc-11-4424-s01.pdf [file cc-11-4424-s01.pdf]

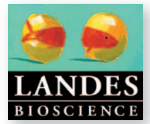

## **Supplemental Material to:**

**Yong-Wei Zhang, Arun K. Ghosh and Yves Pommier**

**Lasonolide A, a potent and reversible inducer of  
chromosome condensation**

**2012; 11(23)**

**<http://dx.doi.org/10.4161/cc.22768>**

**<http://www.landesbioscience.com/journals/cc/22768/>**

## Supplemental Materials

### Materials and Methods

**Cytoskeleton staining.** Cells were cytopun (800 rpm, 8 min) to microscope slides. F-actins were stained by Alexa Fluor 488® *phalloidin* (Invitrogen, A12379) according to the provided protocol (*Life Technologies, Inc.*) Briefly, cells were fixed with 4% paraformaldehyde and penetrated by 0.1% TritonX-100. After being blocked with 1% BSA, cells were stained with 0.5 units Alexa Fluor 488® *phalloidin* for 20 min at room temperature.  $\alpha$ -tubulin was stained by immunofluorescence assay. After fixation, cells were incubated for 20 min with 70% ethanol. Then the slides were incubated in blocking buffer [8% bovine serum albumin (BSA) in PBS] for 1 h before incubation for 2 h with anti- $\alpha$ -tubulin (Cell signaling, 2144) antibodies. Slides were incubated for an additional 1 h with the Alex488-conjugated secondary antibody (Alexa Fluor® 488 goat anti-mouse IgG, Molecular Probes, Invitrogen, A-11001). DNA was stained with 0.5  $\mu$ g/mL propidium iodide. Images were taken using a Nikon Eclipse TE-300 confocal microscope.

**Supplemental Figure 1. Lasonolide A (100 nM for 1 h) reorganizes the cellular filament and tubulin networks in CA46 cells. A.** Cellular tubulin network.  $\alpha$ -tubulin was stained with anti- $\alpha$ -tubulin antibody (Green). DNA was stained with PI (Red). Left, representative images; Right, enlarged representative single cells in each group. **B.** Cellular actin network. Actin was labeled with Alexa Fluor 488® *phalloidin* (Green). DNA was stained with PI (Red). Left, representative images; Right, enlarged representative single cell in each group. Arrowheads indicate changes.

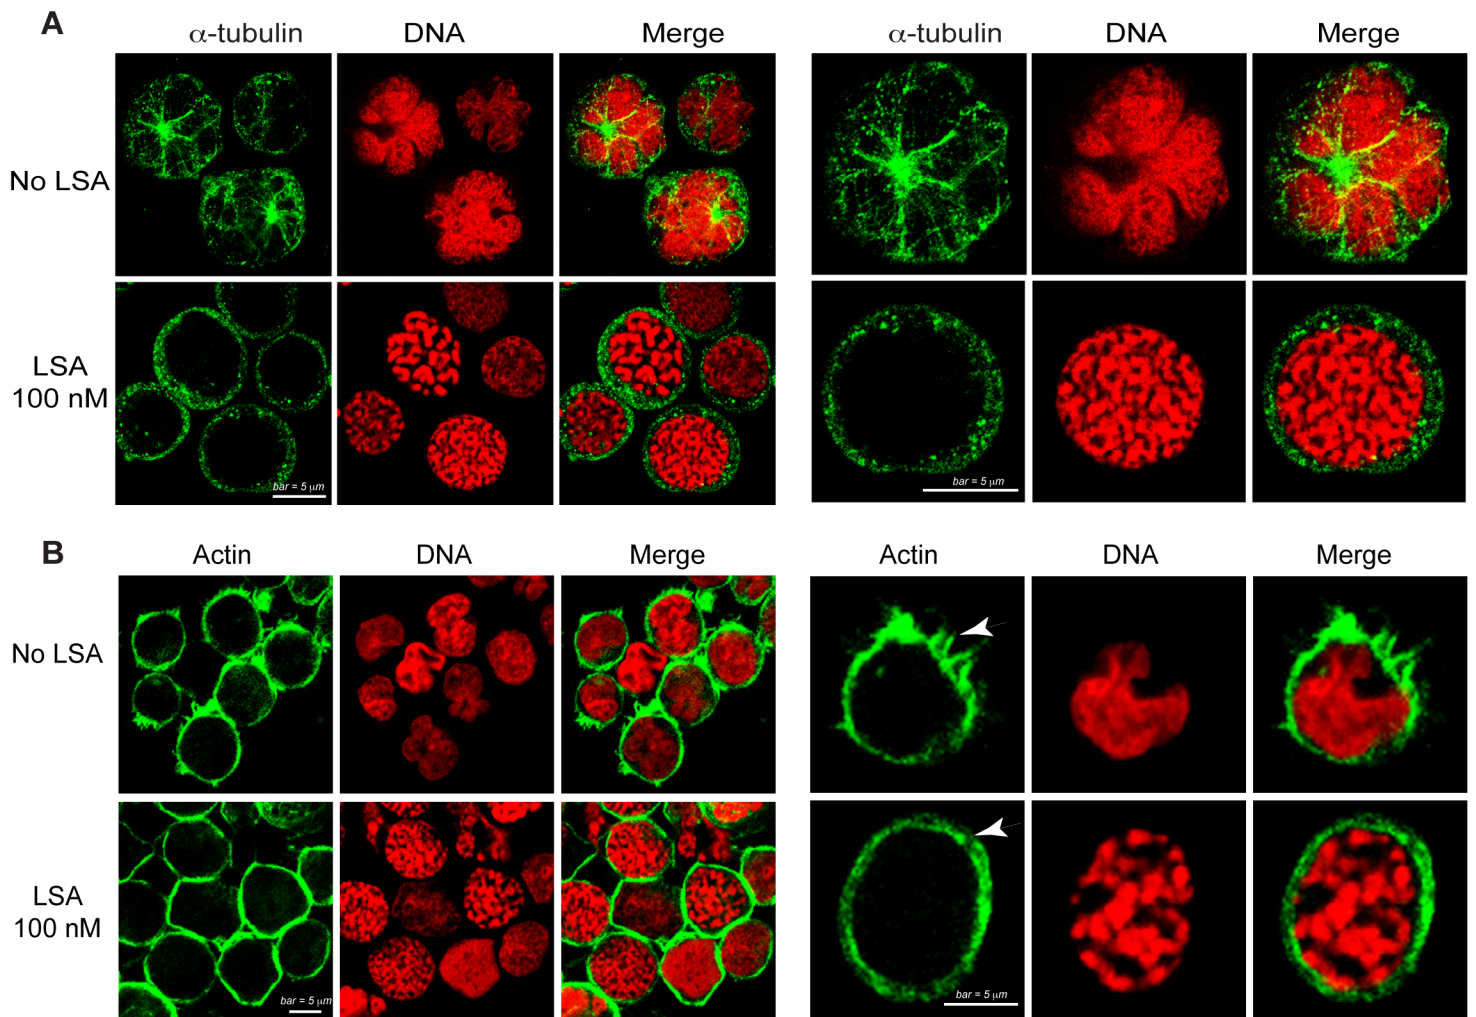

**Supplemental Figure 1.** Lasonolide A (100 nM for 1 h) reorganizes the cellular filament and tubulin networks in CA46 cells. A. Cellular tubulin network.  $\alpha$ -tubulin was stained with anti- $\alpha$ -tubulin antibody (Green). DNA was stained with PI (Red). Left, representative images; Right, enlarged representative single cells in each group. B. Cellular actin network. Actin was labeled with Alexa Fluor 488<sup>®</sup> phalloidin (Green). DNA was stained with PI (Red). Left, representative images; Right, enlarged representative single cell in each group. Arrowheads indicate changes.
